# Supplementary material
Source: Springer Nature journal article supplement (https://www.springermedizin.de/resource/supplementary/12990_2011_392_MOESM6_ESM.pdf/9613168)

Saline

CYP 300 mg/kg

CB<sub>1</sub>

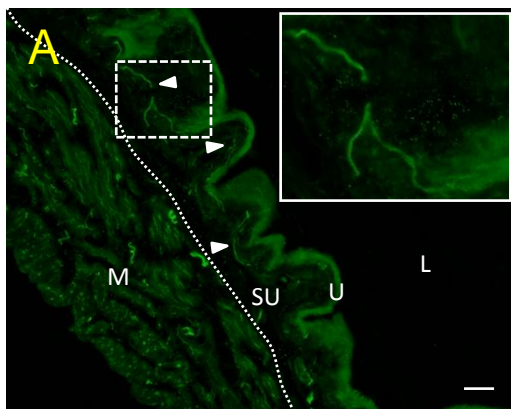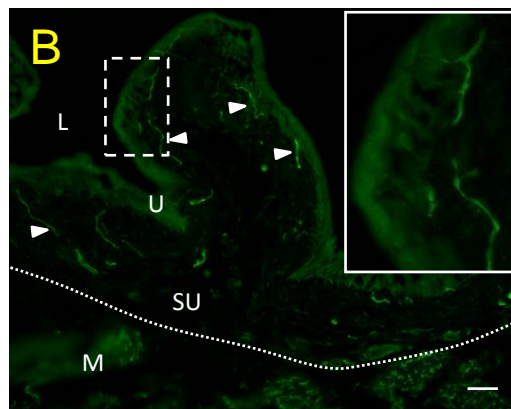

TRPV1

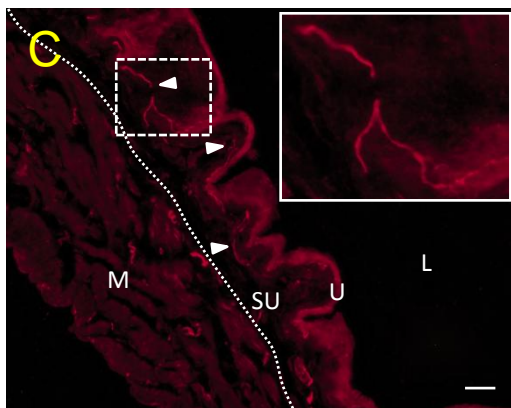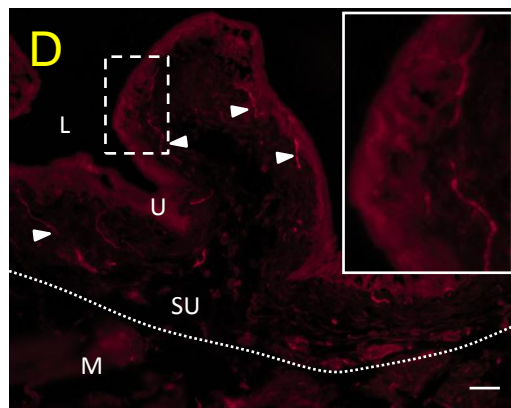

merged

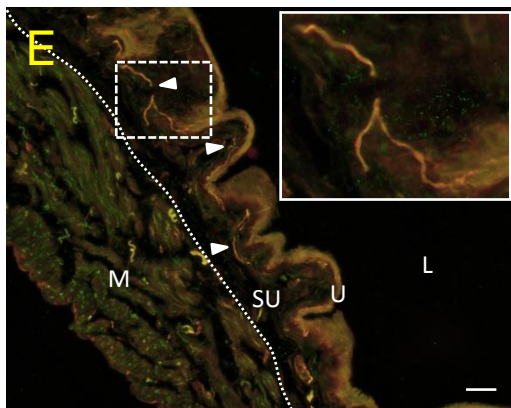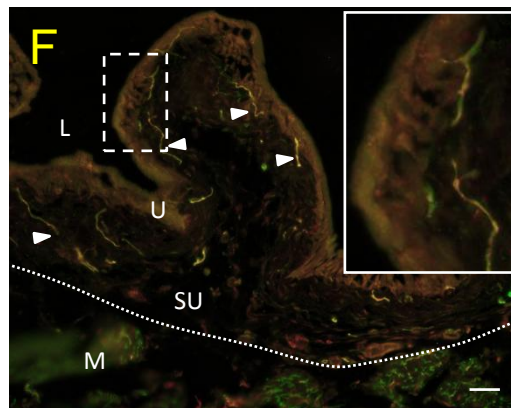

Supplement: MOESM6 [file 9613168]
